# Supplementary material for: Attitudes of Patients with Cancer towards Vaccinations—Results of Online Survey with Special Focus on the Vaccination against COVID-19
Source: MDPI journal article supplement (doi:10.3390/vaccines9050411), 2021-04-21
Supplement: s1 [file s1]

**Supplementary Table S1.** Opinions about vaccinations in general in the subgroup of patients unwilling to get vaccinated against COVID-19 (n=149).

|                                                                                                                               | Disagree<br>(Likert scale 1-2) | Neither disagree nor agree (Likert scale 3) | Agree<br>(Likert scale 4-5) |
|-------------------------------------------------------------------------------------------------------------------------------|--------------------------------|---------------------------------------------|-----------------------------|
| Thanks to preventive vaccinations, many dangerous diseases are practically non-existent today.                                | 13 (8.7)                       | 31 (20.8)                                   | 105 (70.5)                  |
| Vaccinations are the most effective way to protect against serious infectious diseases.                                       | 19 (12.8)                      | 34 (22.8)                                   | 96 (64.4)                   |
| Vaccinations are safe.                                                                                                        | 28 (18.8)                      | 62 (41.6)                                   | 59 (39.6)                   |
| Prior to vaccination, patients are adequately informed about the side effects.                                                | 72 (48.3)                      | 47 (31.5)                                   | 30 (20.1)                   |
| Vaccinations are promoted not because they are really needed, but because it is in the interests of pharmaceutical companies. | 32 (21.5)                      | 63 (42.3)                                   | 54 (36.2)                   |
| Vaccinations in children can cause serious developmental disorders, e.g. autism.                                              | 54 (36.2)                      | 48 (32.2)                                   | 47 (31.5)                   |
| Vaccinations have more advantages than disadvantages                                                                          | 21 (14.1)                      | 66 (44.3)                                   | 62 (41.6)                   |

**Supplementary Table S2.** Opinions about vaccinations in general in the subgroup of patients unwilling to get vaccinated against COVID-19 (n=149).

|                                                                                                                                                                                          | Disagree<br>(Likert scale 1-2) | Neither disagree nor agree<br>(Likert scale 3) | Agree<br>(Likert scale 4-5) |
|------------------------------------------------------------------------------------------------------------------------------------------------------------------------------------------|--------------------------------|------------------------------------------------|-----------------------------|
| I am afraid of the vaccine side effects                                                                                                                                                  | 19 (12.8)                      | 31 (20.8)                                      | 99 (66.4)                   |
| I have concerns about the effectiveness of the vaccine                                                                                                                                   | 14 (9.4)                       | 30 (20.1)                                      | 105 (70.5)                  |
| I am afraid of the composition of the vaccine.                                                                                                                                           | 23 (15.4)                      | 34 (22.8)                                      | 92 (61.7)                   |
| The vaccine was developed too quickly                                                                                                                                                    | 12 (8.1)                       | 18 (12.1)                                      | 119 (79.9)                  |
| The vaccine contains bodies of aborted children                                                                                                                                          | 98 (65.8)                      | 36 (24.2)                                      | 15 (10.1)                   |
| Religious reasons prevent me from vaccinating                                                                                                                                            | 135 (90.6)                     | 11 (7.4)                                       | 3 (2.0)                     |
| Coronavirus does not exist, so you don't need to get vaccinated                                                                                                                          | 109 (73.2)                     | 25 (16.8)                                      | 15 (10.1)                   |
| I do not need to vaccinate because I believe that the risk of getting sick in my case is low, because I adhere to the recommendations of isolation and have no contact with other people | 63 (42.3)                      | 55 (36.9)                                      | 31 (20.8)                   |
| I believe that patients in active cancer treatment should get vaccinated first                                                                                                           | 45 (30.2)                      | 54 (36.2)                                      | 50 (33.6)                   |
| I believe that COVID-19 vaccination should be mandatory                                                                                                                                  | 115 (77.2)                     | 23 (15.4)                                      | 11 (7.4)                    |
| I am sufficiently informed about the possibilities and safety of vaccination in cancer patients                                                                                          | 96 (64.4)                      | 28 (18.8)                                      | 25 (16.8)                   |
| I believe that cancer patients should not be vaccinated against COVID-19                                                                                                                 | 44 (29.5)                      | 73 (49.0)                                      | 32 (21.5)                   |
